# Supplementary figures and images for: JNK1 controls adult hippocampal neurogenesis and imposes cell-autonomous control of anxiety behaviour from the neurogenic niche
Source: PubMed Central journal article supplement — Mol Psychiatry. 2016 Nov 15;23(2):362–74. doi: 10.1038/mp.2016.203 (PMC5794884; doi:10.1038/mp.2016.203), 2016-11-15

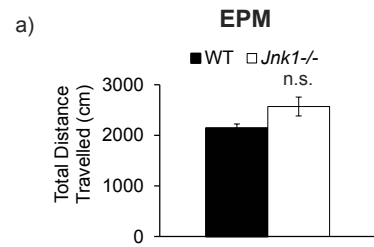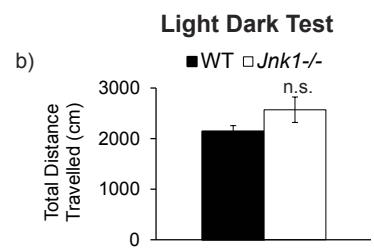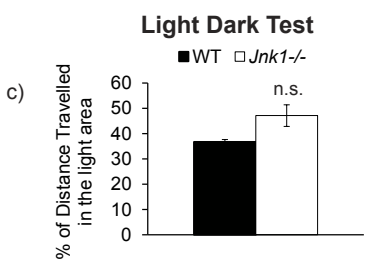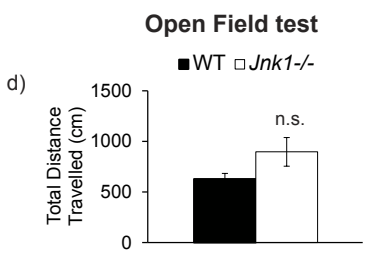

e)

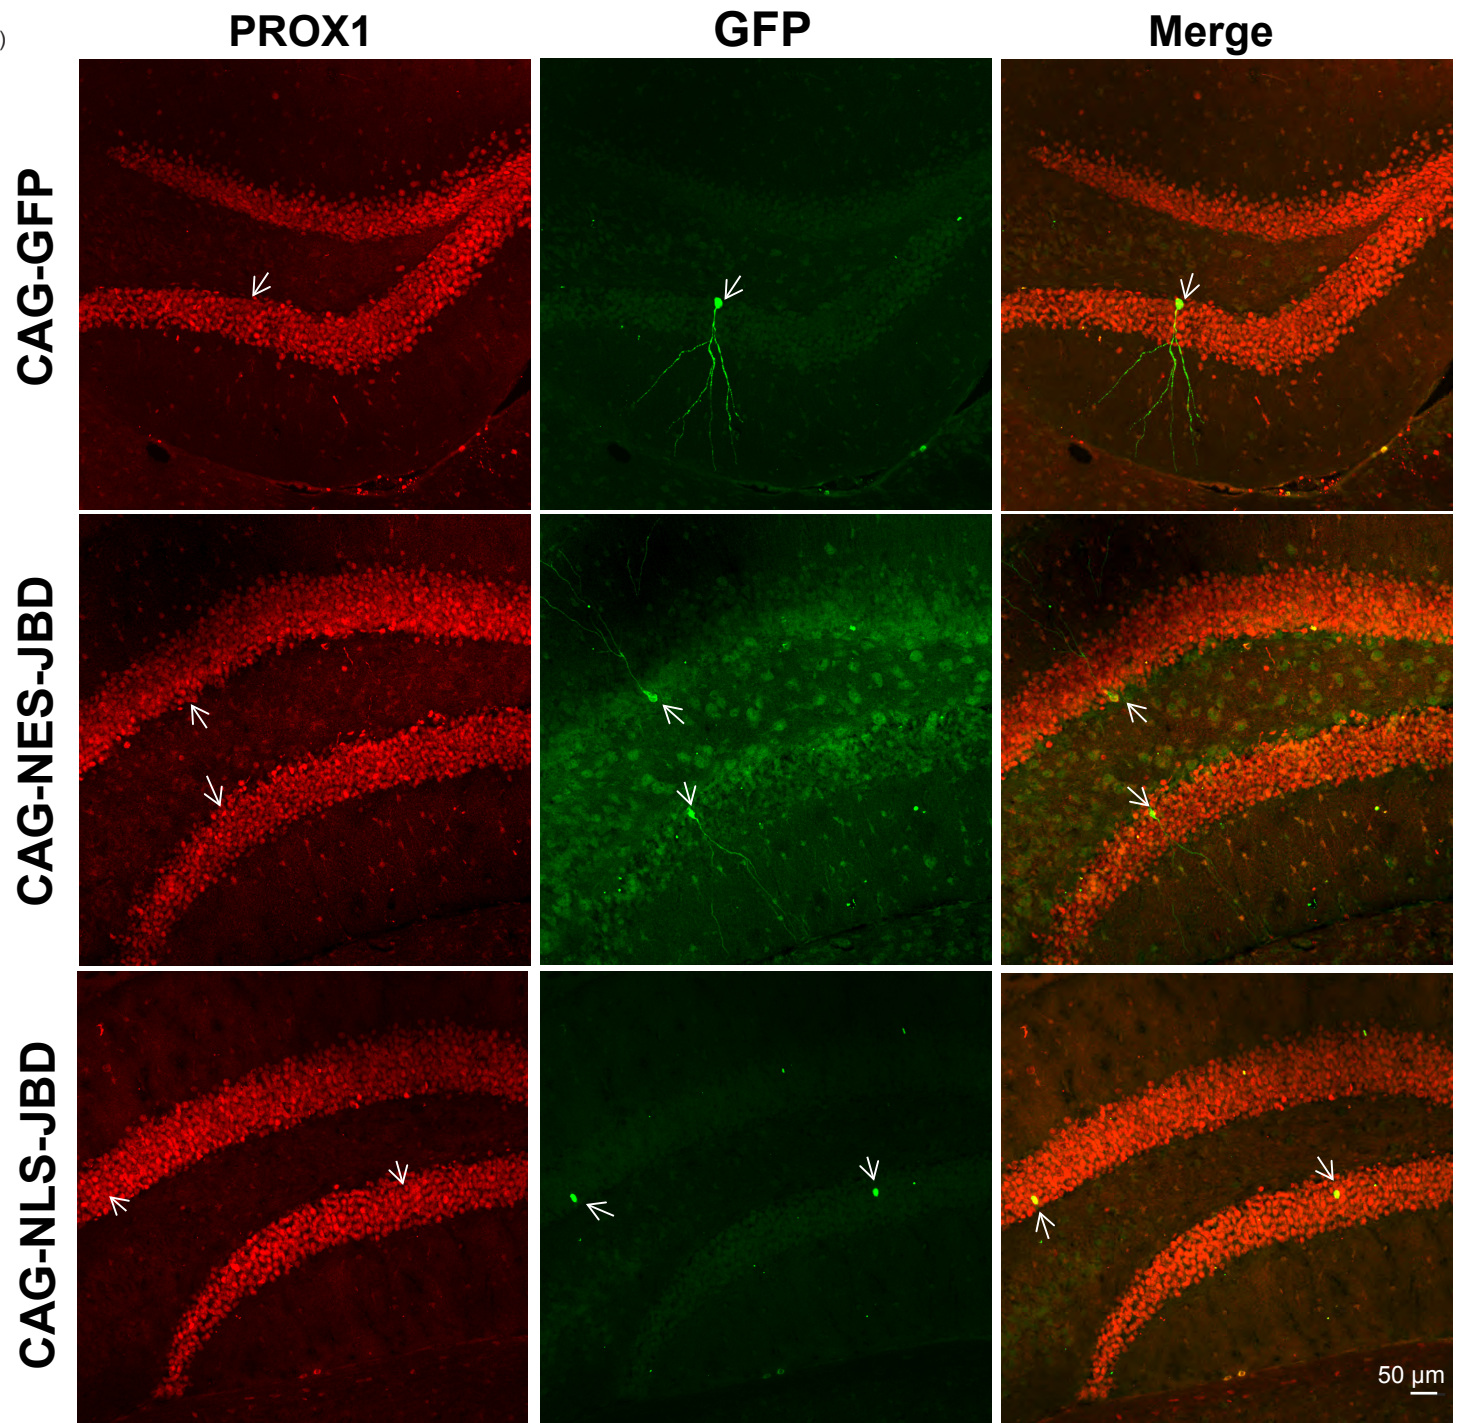

Supplementary figure 1

Supplement: mp2016203x1.pdf [file mp2016203x1.pdf]

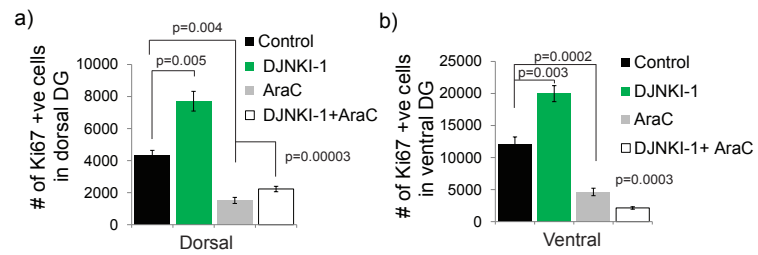

c) Ki67 immunohistochemistry

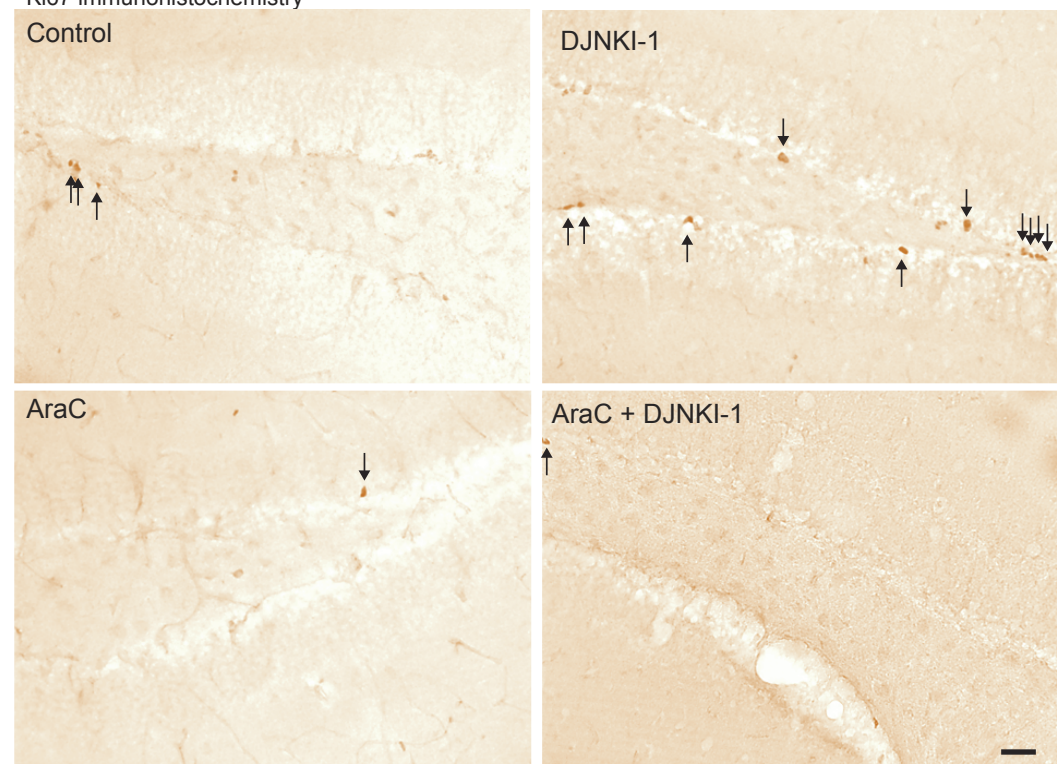

d) DCX immunohistochemistry

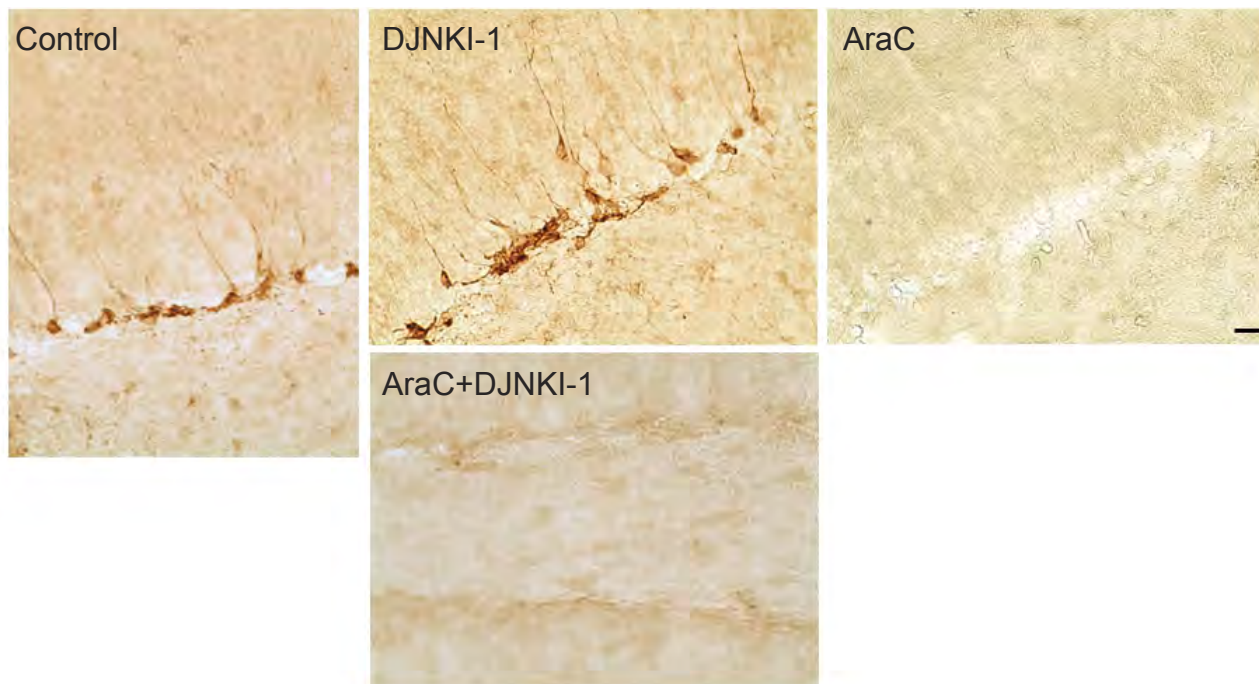

Supplementary figure 2

Supplement: mp2016203x2.pdf [file mp2016203x2.pdf]
